# Supplementary material for: Optimization of Aerosol Model Selection for TROPOMI/S5P
Source: MDPI journal article supplement (doi:10.3390/rs13132489), 2021-06-25
Supplement: s1 [file s1]

Archive with 1 entries (1 files):
- remotesensing-1240617-supplementary.pdf
